# Supplementary material
Source: MDPI journal article supplement (https://www.mdpi.com/2073-4352/11/10/1156)
Supplement: s1 [file s1]

# FACILE SYNTHESIS AND X-RAY STRUCTURE OF [1,2,4]TRIAZOLO[4,3-A]PYRIDINES VIA OXIDATIVE CYCLIZATION USING N-CHLOROSUCCINIMIDE (NCS)

Said El-Kurdi<sup>1</sup>, Bassam Abu Thaher<sup>1\*</sup>, Kanan Wahedy<sup>2</sup>, Dieter Schollmeyer<sup>3</sup>, Levin Nopper<sup>4</sup> and Hans-Peter Degner<sup>4,†</sup>

<sup>1</sup> Faculty of Science, Chemistry Department, Islamic University of Gaza, Gaza Strip, Palestine 1; skurdi@iugaza.edu.ps (S.K.); bthaher@iugaza.edu.ps (B.T.)

<sup>2</sup> Faculty of Pharmacy, Department of Pharmaceutical Chemistry, Alazhar University-Gaza, Gaza Strip, Palestine, k.wahedy@alazhar.edu.ps (K.W.)

<sup>3</sup> Department of Chemistry, Johannes Gutenberg-University Mainz, Duesbergweg 10-14, 55099 Mainz, Germany; scholli@uni-mainz.de (D. S.)

<sup>4</sup> Institute of Precision Medicine, Medical and Life Sciences Faculty, Furtwangen University, Jakob-Kienzle-Straße 17, 78054 Villingen-Schwenningen, Germany; e-mail@e-mail.com

\* Correspondence: bthaher@iugaza.edu.ps

† Correspondence: Hans-Peter.Degner@hs-furtwangen.de; Tel.: +49-7720-307-4232 (H-P.T.)

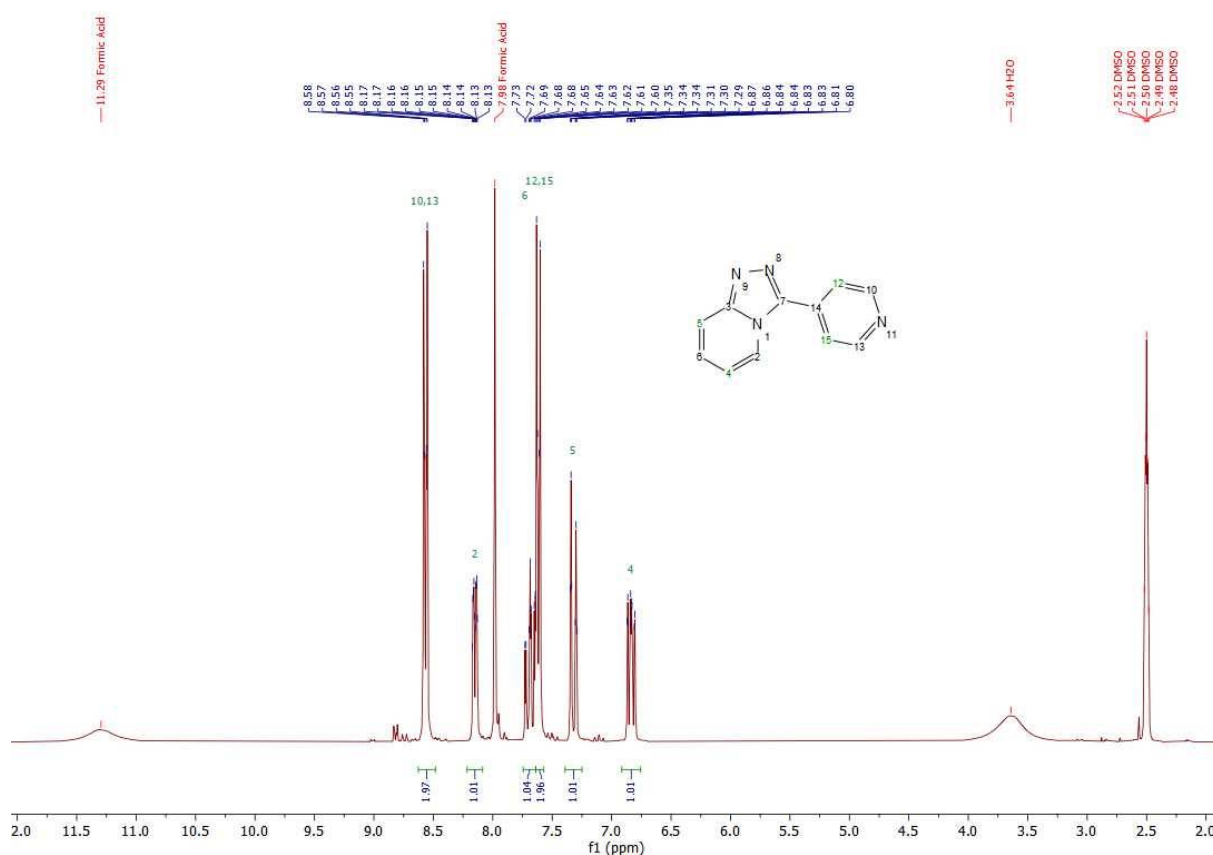

Figure S1. <sup>1</sup>H NMR of **1**.

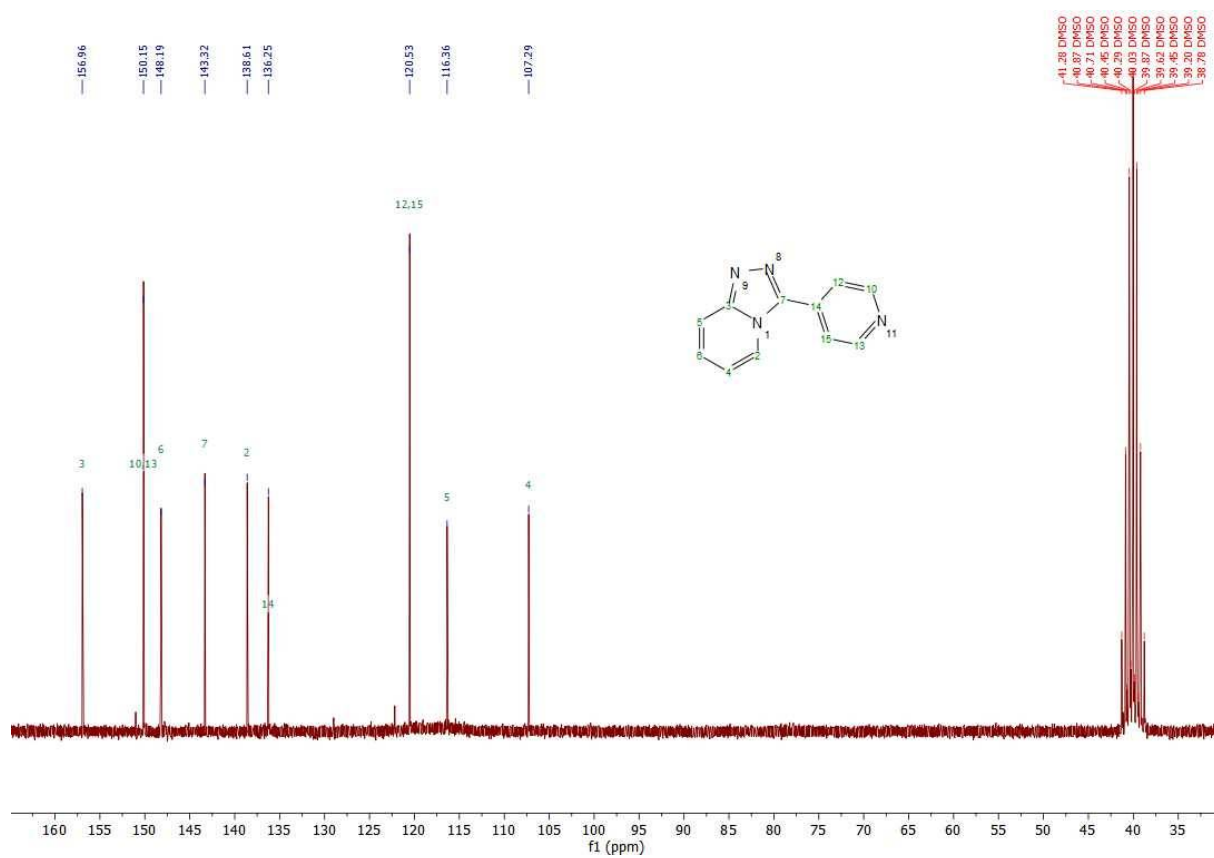

Figure S2.  $^{13}\text{C}$  NMR of **1**.

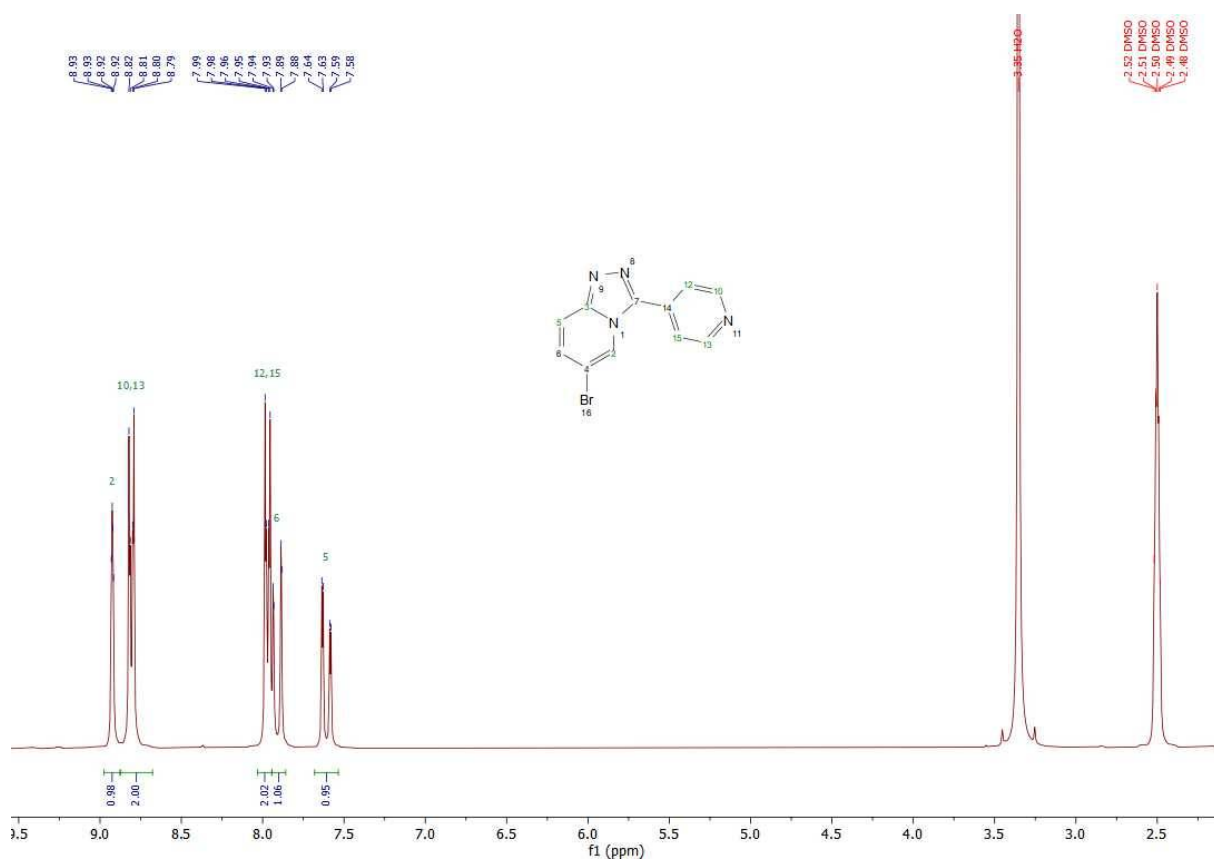

Figure S3.  $^1\text{H}$  NMR of **2**.

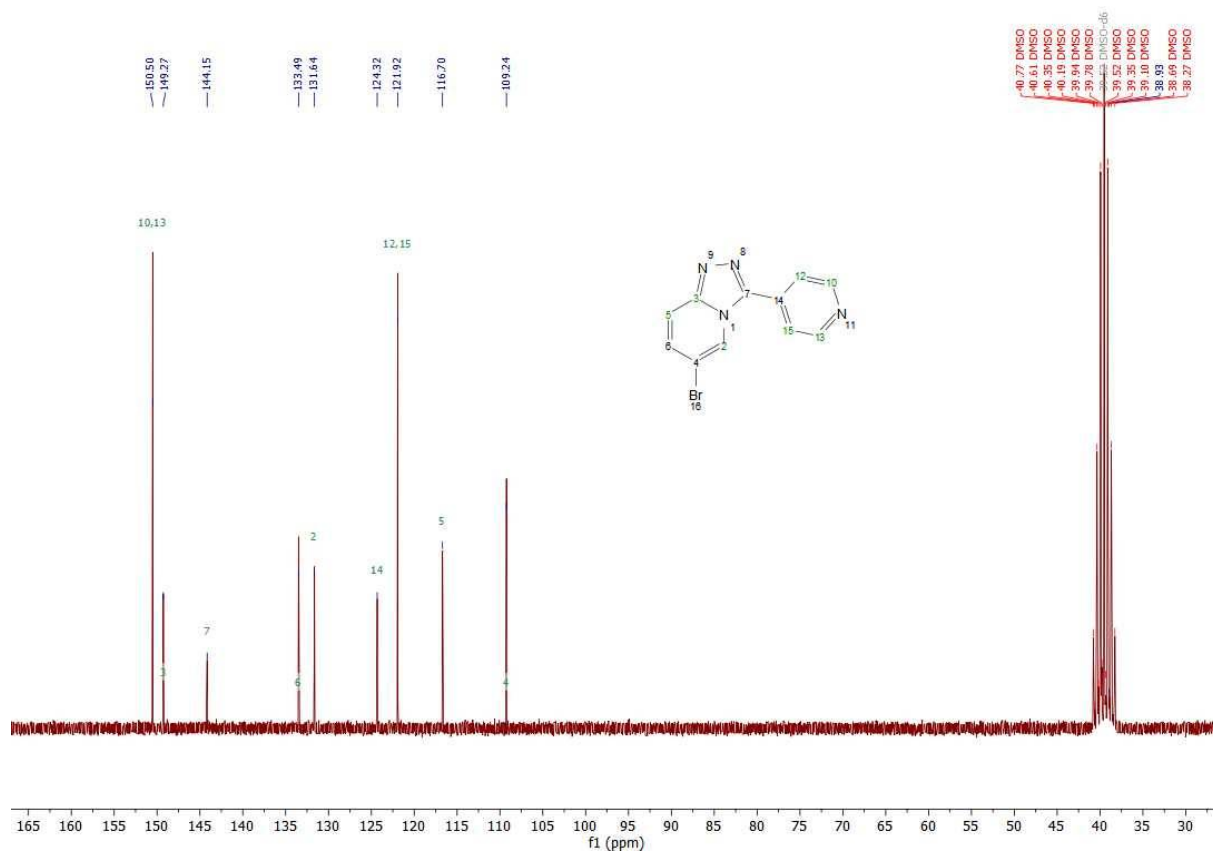

Figure S4. <sup>13</sup>C NMR of **2**.

Hochschule Furtwangen

Fakultät Medical and Life Sciences

FTIR-Spektrometer: Tensor 27

ATR-Zubehör: Golden Gate #11124563

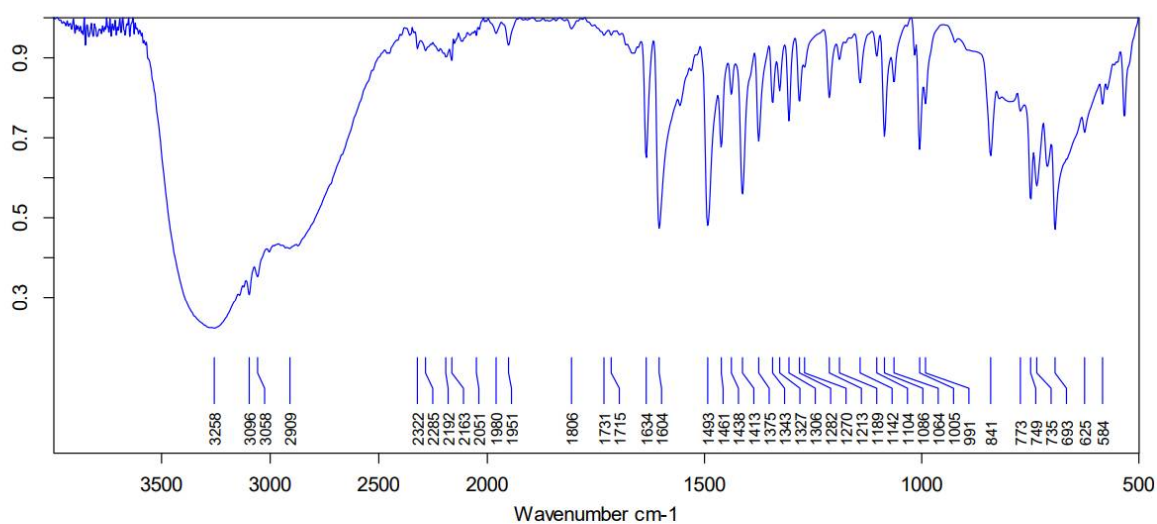

Compound 1.0

29.08.2018

Figure S5. FTIR-Spectrum of **1**.

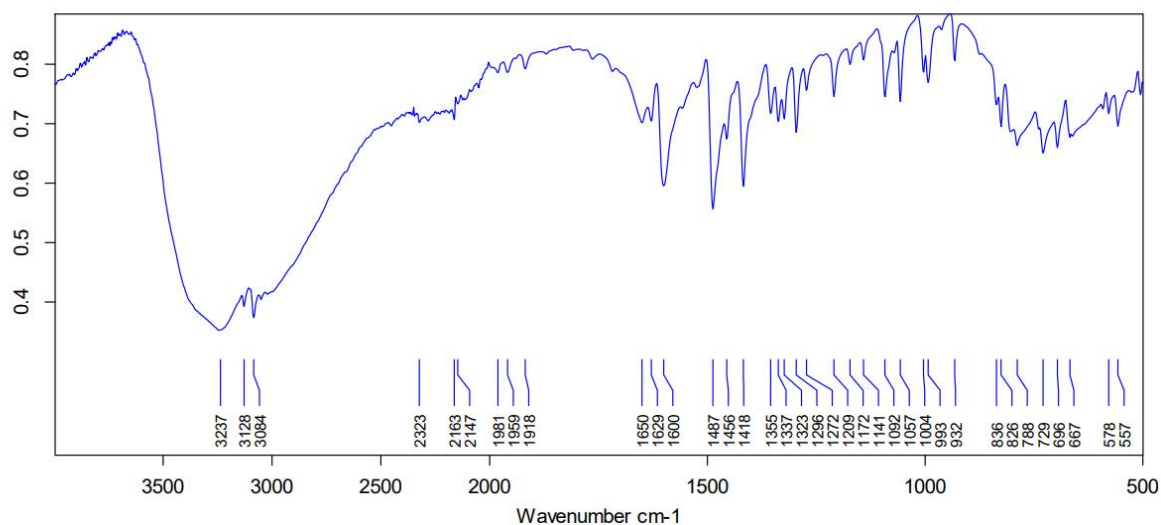

Compound 2.0

29.08.2018

Figure S6. FTIR-Spectrum of **2**.

Custom Annotation:

Sample Name: S4

Project: abbaWiSe2018  
Method Path: D:\Analyst  
Method Name: N/A

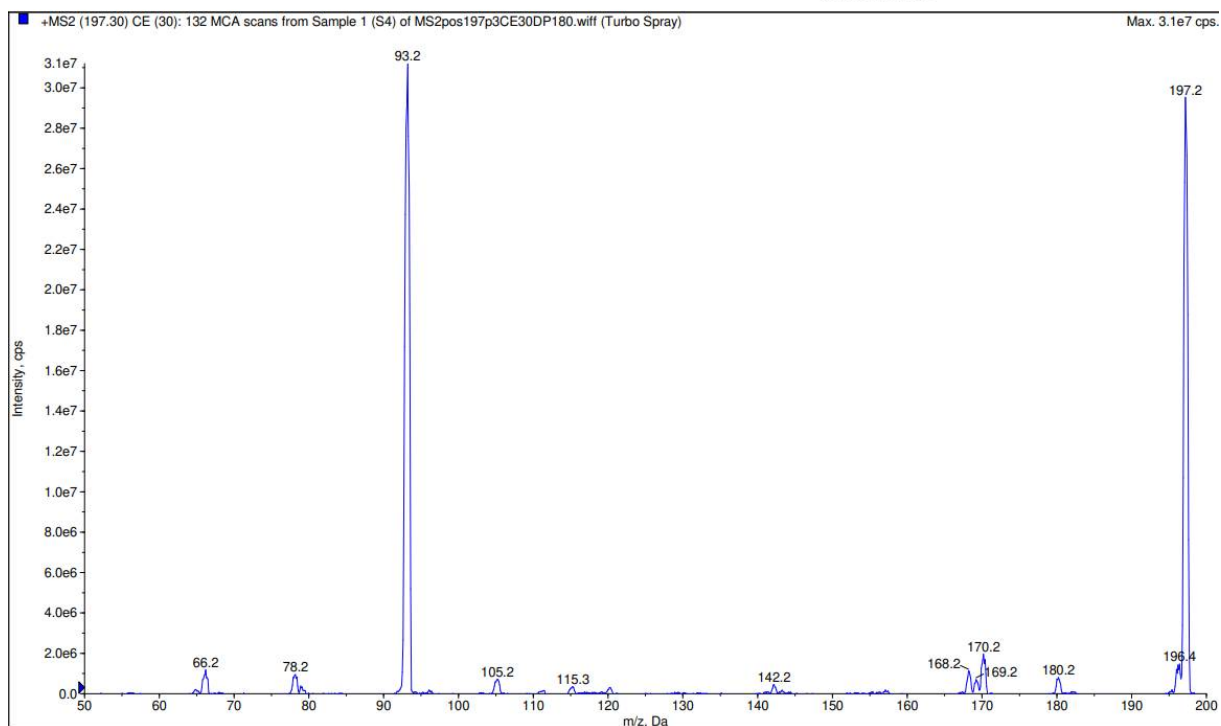

Acq. Date: Wednesday, July 11, 2018  
Polarity/Scan Type: Positive Product Ion  
Acq. File: MS2pos197p3CE30DP180.wiff

Analyst Version: 1.6.2

Printing Date: Monday, December 17, 2018

Figure S7. Fragment Ion Scan of **1**.

Custom Annotation:

Sample Name: S2

Project: abbauWise2018  
Method Path: D:\Analyst  
Method Name: N/A

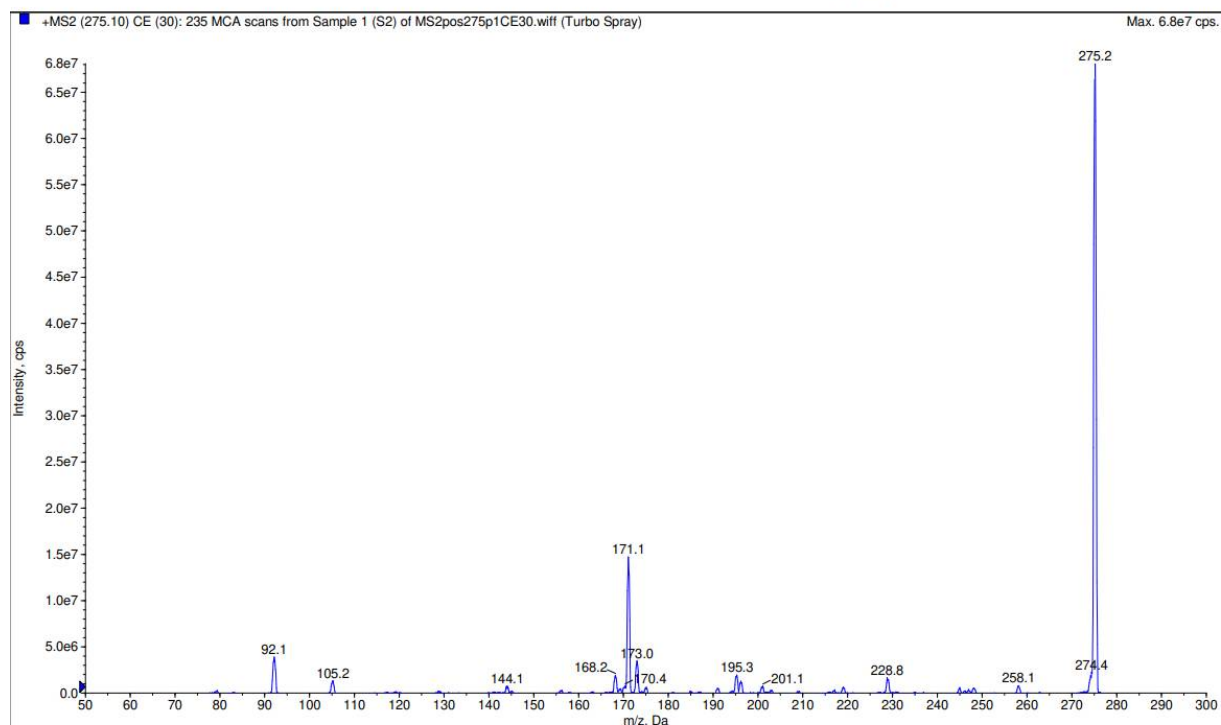

Acq. Date: Wednesday, July 11, 2018

Analyst Version: 1.6.2

Printing Date: Monday, December 17, 2018

Figure S8. Fragment Ion Scan of **2**.

Custom Annotation:

Sample Name: S2

Project: abbauWise2018  
Method Path: D:\Analyst  
Method Name: N/A

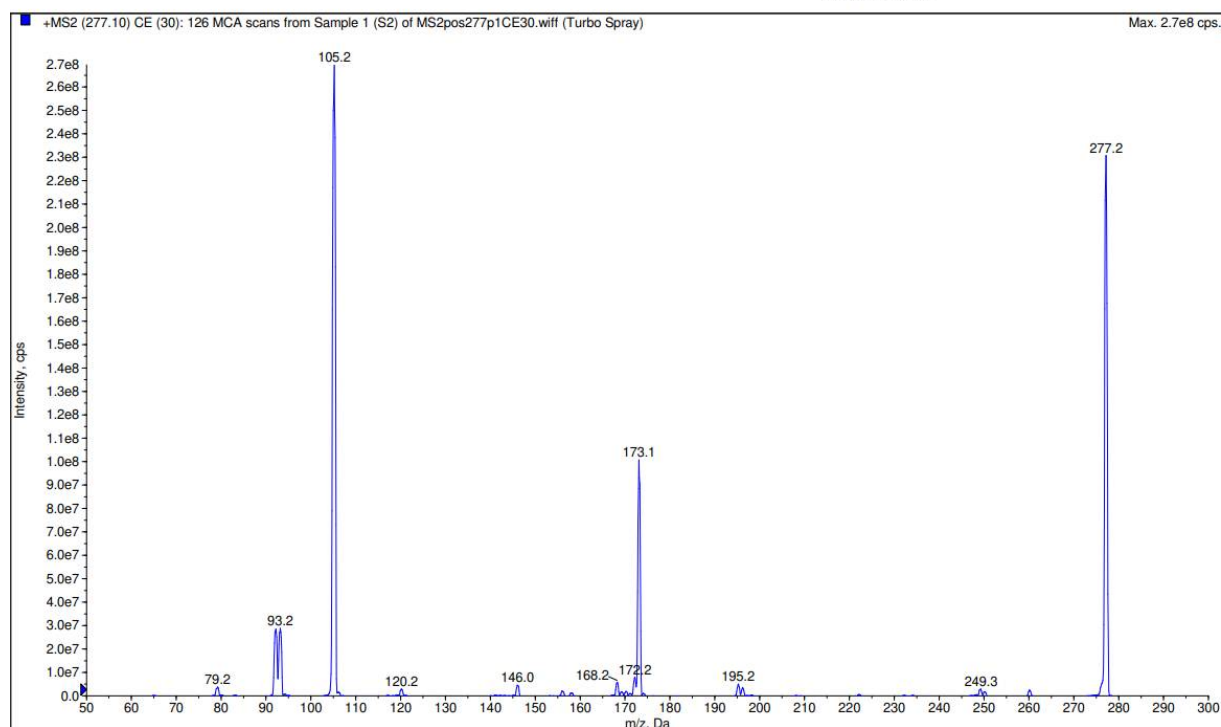

Acq. Date: Friday, July 06, 2018

Analyst Version: 1.6.2

Printing Date: Monday, December 17, 2018

Figure S9. Fragment Ion Scan of **2**.

Table S1. Crystal data and structure refinement for 1

|                                                                |                                                                     |
|----------------------------------------------------------------|---------------------------------------------------------------------|
| CCDC code                                                      | 204925                                                              |
| Empirical formula                                              | C <sub>11</sub> H <sub>14</sub> N <sub>4</sub> O <sub>3</sub>       |
| moiety formula                                                 | C <sub>11</sub> H <sub>8</sub> N <sub>4</sub> , 3(H <sub>2</sub> O) |
| Formula weight                                                 | 250.26                                                              |
| Temperature                                                    | 193(2) K                                                            |
| Wavelength, radiation type                                     | 0.71073 Å, MoK $\alpha$                                             |
| Diffractometer                                                 | STOE IPDS 2T                                                        |
| Crystal system                                                 | Monoclinic                                                          |
| Space group name, number                                       | P 2 <sub>1</sub> /c, (14)                                           |
| Unit cell dimensions                                           | a = 14.3213(11) Å<br>b = 6.9452(4) Å<br>c = 12.6860(8) Å            |
| Volume                                                         | 1241.61(14) Å <sup>3</sup>                                          |
| Number of reflections<br>and range used for lattice parameters | 2671<br>2.89° ≤ $\theta$ ≤ 27.85°                                   |
| Z                                                              | 4                                                                   |
| Density (calculated)                                           | 1.339 Mg/m <sup>3</sup>                                             |
| Absorption coefficient                                         | 0.100 mm <sup>-1</sup>                                              |
| Absorption correction                                          | None                                                                |
| F(000)                                                         | 528                                                                 |
| Crystal size, colour and form                                  | 0.060 x 0.100 x 0.450 mm <sup>3</sup> , colourless plate            |
| Theta range for data collection                                | 2.891 to 28.297°.                                                   |
| Index ranges                                                   | -19 ≤ h ≤ 19, -9 ≤ k ≤ 8, -16 ≤ l ≤ 16                              |
| Number of reflections:                                         |                                                                     |
| collected                                                      | 6513                                                                |
| independent                                                    | 3058 [R(int) = 0.0451]                                              |
| observed [I > 2 $\sigma$ (I)]                                  | 1545                                                                |
| Completeness to $\theta$ = 25.2°                               | 99.5 %                                                              |
| Refinement method                                              | Full-matrix least-squares on F <sup>2</sup>                         |
| Data / restraints / parameters                                 | 3058 / 6 / 205                                                      |
| Goodness-of-fit on F <sup>2</sup>                              | 0.953                                                               |
| Final R indices [I > 2 $\sigma$ (I)]                           | R1 = 0.0561, wR2 = 0.1277                                           |
| R indices (all data)                                           | R1 = 0.1258, wR2 = 0.1506                                           |
| Largest diff. peak and hole                                    | 0.242 and -0.222 eÅ <sup>-3</sup>                                   |

Table S2. Atomic coordinates and equivalent isotropic displacement parameters ( $\text{\AA}^2$ ) for 1.  $U(\text{eq})$  is defined as one third of the trace of the orthogonalized  $U_{ij}$  tensor.

| Atom | x           | y         | z           | $U(\text{eq})$ |
|------|-------------|-----------|-------------|----------------|
| C1   | 0.46309(15) | 0.6459(3) | 0.17906(15) | 0.0297(5)      |
| N2   | 0.46650(14) | 0.6781(3) | 0.07740(13) | 0.0382(5)      |
| N3   | 0.37683(15) | 0.6800(3) | 0.01977(14) | 0.0444(6)      |
| C4   | 0.31782(18) | 0.6504(4) | 0.08750(17) | 0.0382(6)      |
| C5   | 0.21792(19) | 0.6398(4) | 0.0699(2)   | 0.0499(7)      |
| C6   | 0.1745(2)   | 0.6069(5) | 0.1548(3)   | 0.0570(8)      |
| C7   | 0.2292(2)   | 0.5820(4) | 0.2587(2)   | 0.0533(7)      |
| C8   | 0.32435(19) | 0.5910(4) | 0.2765(2)   | 0.0403(6)      |
| N9   | 0.36930(13) | 0.6274(3) | 0.19053(13) | 0.0314(5)      |
| C10  | 0.54768(15) | 0.6371(3) | 0.26141(16) | 0.0290(5)      |
| C11  | 0.55050(17) | 0.6869(3) | 0.36868(17) | 0.0332(5)      |
| C12  | 0.63698(18) | 0.6827(4) | 0.43786(18) | 0.0378(6)      |
| N13  | 0.71952(14) | 0.6370(3) | 0.40921(15) | 0.0412(5)      |
| C14  | 0.71635(19) | 0.5883(4) | 0.3059(2)   | 0.0395(6)      |
| C15  | 0.63390(17) | 0.5844(3) | 0.23116(19) | 0.0352(6)      |
| O1W  | 0.89786(13) | 0.6710(3) | 0.53289(13) | 0.0449(5)      |
| O2W  | 0.92187(15) | 0.9708(3) | 0.68122(15) | 0.0517(5)      |
| O3W  | 0.98500(13) | 0.3311(3) | 0.62154(13) | 0.0472(5)      |

Table S3. Anisotropic displacement parameters ( $\text{\AA}^2$ ) for 1. The anisotropic displacement factor exponent takes the form:  $-2\pi^2 [h^2 a^{*2} U_{11} + \dots + 2 h k a^* b^* U_{12}]$

| Atom | $U_{11}$   | $U_{22}$   | $U_{33}$   | $U_{23}$    |
|------|------------|------------|------------|-------------|
| C1   | 0.0339(12) | 0.0266(12) | 0.0312(10) | -0.0016(9)  |
| N2   | 0.0440(12) | 0.0429(13) | 0.0290(9)  | 0.0006(8)   |
| N3   | 0.0525(14) | 0.0487(14) | 0.0315(10) | -0.0014(9)  |
| C4   | 0.0437(15) | 0.0359(14) | 0.0338(11) | -0.0055(10) |
| C5   | 0.0384(16) | 0.0494(18) | 0.0583(16) | -0.0093(13) |
| C6   | 0.0343(16) | 0.056(2)   | 0.079(2)   | -0.0107(15) |
| C7   | 0.0458(17) | 0.0550(19) | 0.0636(17) | -0.0082(14) |
| C8   | 0.0429(16) | 0.0417(15) | 0.0399(13) | -0.0026(11) |
| N9   | 0.0348(11) | 0.0295(11) | 0.0309(9)  | -0.0022(8)  |
| C10  | 0.0332(13) | 0.0244(12) | 0.0307(10) | 0.0010(9)   |
| C11  | 0.0340(14) | 0.0337(14) | 0.0335(11) | -0.0004(9)  |
| C12  | 0.0441(15) | 0.0353(14) | 0.0341(11) | -0.0019(10) |
| N13  | 0.0401(13) | 0.0389(12) | 0.0433(11) | -0.0019(9)  |
| C14  | 0.0357(14) | 0.0359(15) | 0.0485(14) | 0.0018(11)  |
| C15  | 0.0410(15) | 0.0317(13) | 0.0352(12) | -0.0001(10) |
| O1W  | 0.0407(11) | 0.0507(12) | 0.0405(9)  | 0.0022(8)   |
| O2W  | 0.0539(13) | 0.0486(13) | 0.0519(11) | -0.0032(9)  |
| O3W  | 0.0487(12) | 0.0549(13) | 0.0372(9)  | -0.0008(9)  |

Table S4. Hydrogen coordinates and isotropic displacement parameters ( $\text{\AA}^2$ ) for 1.

| Atom | x        | y        | z         | U(eq) |
|------|----------|----------|-----------|-------|
| H5   | 0.181(2) | 0.654(4) | -0.007(2) | 0.060 |
| H6   | 0.105(2) | 0.603(4) | 0.142(2)  | 0.068 |
| H7   | 0.197(2) | 0.537(4) | 0.319(2)  | 0.064 |
| H8   | 0.365(2) | 0.580(4) | 0.341(2)  | 0.048 |
| H11  | 0.498(2) | 0.731(4) | 0.393(2)  | 0.040 |
| H12  | 0.640(2) | 0.717(4) | 0.512(2)  | 0.045 |
| H14  | 0.780(2) | 0.558(4) | 0.288(2)  | 0.047 |
| H15  | 0.635(2) | 0.552(3) | 0.158(2)  | 0.042 |
| H1W  | 0.924(2) | 0.571(3) | 0.566(2)  | 0.067 |
| H2W  | 0.839(1) | 0.651(4) | 0.494(2)  | 0.067 |
| H3W  | 0.951(2) | 1.073(3) | 0.669(2)  | 0.077 |
| H4W  | 0.915(2) | 0.876(4) | 0.634(2)  | 0.077 |
| H5W  | 1.019(2) | 0.368(4) | 0.676(2)  | 0.071 |
| H6W  | 1.022(2) | 0.314(5) | 0.575(2)  | 0.071 |

Table S5. Bond lengths [ $\text{\AA}$ ] and angles [ $^\circ$ ] for 1.

| Bond lengths [ $\text{\AA}$ ] |           | Bond angles [ $^\circ$ ] |            |
|-------------------------------|-----------|--------------------------|------------|
| C1-N2                         | 1.318(3)  | N2-C1-N9                 | 108.95(18) |
| C1-N9                         | 1.383(3)  | N2-C1-C10                | 122.61(19) |
| C1-C10                        | 1.453(3)  | N9-C1-C10                | 128.43(17) |
| N2-N3                         | 1.360(3)  | C1-N2-N3                 | 109.36(19) |
| N3-C4                         | 1.324(3)  | C4-N3-N2                 | 107.48(17) |
| C4-N9                         | 1.391(3)  | N3-C4-N9                 | 109.6(2)   |
| C4-C5                         | 1.410(4)  | N3-C4-C5                 | 130.7(2)   |
| C5-C6                         | 1.355(4)  | N9-C4-C5                 | 119.7(2)   |
| C5-H5                         | 1.03(3)   | C6-C5-C4                 | 118.6(3)   |
| C6-C7                         | 1.419(4)  | C6-C5-H5                 | 122.1(15)  |
| C6-H6                         | 0.99(3)   | C4-C5-H5                 | 119.2(15)  |
| C7-C8                         | 1.342(4)  | C5-C6-C7                 | 120.2(3)   |
| C7-H7                         | 1.02(3)   | C5-C6-H6                 | 118.3(17)  |
| C8-N9                         | 1.385(3)  | C7-C6-H6                 | 121.5(17)  |
| C8-H8                         | 0.91(3)   | C8-C7-C6                 | 121.8(3)   |
| C10-C11                       | 1.398(3)  | C8-C7-H7                 | 118.3(17)  |
| C10-C15                       | 1.405(3)  | C6-C7-H7                 | 119.3(17)  |
| C11-C12                       | 1.385(3)  | C7-C8-N9                 | 118.4(2)   |
| C11-H11                       | 0.91(2)   | C7-C8-H8                 | 127.7(16)  |
| C12-N13                       | 1.336(3)  | N9-C8-H8                 | 113.8(16)  |
| C12-H12                       | 0.96(2)   | C1-N9-C8                 | 134.14(19) |
| N13-C14                       | 1.346(3)  | C1-N9-C4                 | 104.64(17) |
| C14-C15                       | 1.377(3)  | C8-N9-C4                 | 121.2(2)   |
| C14-H14                       | 1.01(3)   | C11-C10-C15              | 117.1(2)   |
| C15-H15                       | 0.95(2)   | C11-C10-C1               | 124.4(2)   |
| O1W-H1W                       | 0.862(17) | C15-C10-C1               | 118.37(18) |
| O1W-H2W                       | 0.906(17) | C12-C11-C10              | 118.6(2)   |
| O2W-H3W                       | 0.856(18) | C12-C11-H11              | 119.7(14)  |
| O2W-H4W                       | 0.880(18) | C10-C11-H11              | 121.5(14)  |
| O3W-H5W                       | 0.812(18) | N13-C12-C11              | 124.6(2)   |
| O3W-H6W                       | 0.866(17) | N13-C12-H12              | 116.2(15)  |
|                               |           | C11-C12-H12              | 119.2(15)  |
|                               |           | C12-N13-C14              | 116.5(2)   |
|                               |           | N13-C14-C15              | 123.5(2)   |
|                               |           | N13-C14-H14              | 113.8(14)  |
|                               |           | C15-C14-H14              | 122.7(14)  |



|             |           |
|-------------|-----------|
| C14-C15-C10 | 119.6(2)  |
| C14-C15-H15 | 121.0(15) |
| C10-C15-H15 | 119.3(15) |
| H1W-O1W-H2W | 115(3)    |
| H3W-O2W-H4W | 120(3)    |
| H5W-O3W-H6W | 106(3)    |

Table S6. Torsion angles [°] for 1.

|                 |           |
|-----------------|-----------|
| N9-C1-N2-N3     | -0.5(3)   |
| C10-C1-N2-N3    | -179.5(2) |
| C1-N2-N3-C4     | 0.6(3)    |
| N2-N3-C4-N9     | -0.4(3)   |
| N2-N3-C4-C5     | 179.7(3)  |
| N3-C4-C5-C6     | 179.8(3)  |
| N9-C4-C5-C6     | 0.0(4)    |
| C4-C5-C6-C7     | -0.7(4)   |
| C5-C6-C7-C8     | 0.4(5)    |
| C6-C7-C8-N9     | 0.6(4)    |
| N2-C1-N9-C8     | 179.0(2)  |
| C10-C1-N9-C8    | -2.1(4)   |
| N2-C1-N9-C4     | 0.2(2)    |
| C10-C1-N9-C4    | 179.1(2)  |
| C7-C8-N9-C1     | -179.9(3) |
| C7-C8-N9-C4     | -1.3(4)   |
| N3-C4-N9-C1     | 0.1(3)    |
| C5-C4-N9-C1     | -180.0(2) |
| N3-C4-N9-C8     | -178.9(2) |
| C5-C4-N9-C8     | 1.0(3)    |
| N2-C1-C10-C11   | 150.7(2)  |
| N9-C1-C10-C11   | -28.0(4)  |
| N2-C1-C10-C15   | -25.9(3)  |
| N9-C1-C10-C15   | 155.3(2)  |
| C15-C10-C11-C12 | 0.4(3)    |
| C1-C10-C11-C12  | -176.3(2) |
| C10-C11-C12-N13 | 1.1(4)    |
| C11-C12-N13-C14 | -1.4(4)   |
| C12-N13-C14-C15 | 0.1(4)    |
| N13-C14-C15-C10 | 1.4(4)    |
| C11-C10-C15-C14 | -1.6(3)   |
| C1-C10-C15-C14  | 175.3(2)  |

Table S7. Hydrogen bonds for 1 [ $\text{\AA}$  and °].

| D-H...A         | d(D-H)    | d(H...A)  | d(D...A) | <(DHA) |
|-----------------|-----------|-----------|----------|--------|
| O1W-H1W...O3W   | 0.862(17) | 1.954(18) | 2.810(3) | 172(3) |
| O1W-H2W...N13   | 0.906(17) | 1.857(18) | 2.759(3) | 174(3) |
| O2W-H3W...O3W#1 | 0.856(18) | 1.98(2)   | 2.810(3) | 164(3) |
| O2W-H4W...O1W   | 0.880(18) | 1.906(18) | 2.786(3) | 179(3) |
| O3W-H5W...O2W#2 | 0.812(18) | 1.991(19) | 2.791(3) | 169(3) |
| O3W-H6W...O1W#3 | 0.866(17) | 1.942(18) | 2.797(3) | 169(3) |

Symmetry transformations used to generate equivalent atoms:

#1 x,y+1,z    #2 -x+2,y-1/2,-z+3/2    #3 -x+2,-y+1,-z+1

Table S8. Crystal data and structure refinement for 2.

|                                                                |                                                                       |
|----------------------------------------------------------------|-----------------------------------------------------------------------|
| CCDC code                                                      | 204925                                                                |
| Empirical formula                                              | C <sub>11</sub> H <sub>13</sub> BrN <sub>4</sub> O <sub>3</sub>       |
| moiety formula                                                 | C <sub>11</sub> H <sub>7</sub> BrN <sub>4</sub> , 3(H <sub>2</sub> O) |
| Formula weight                                                 | 329.16                                                                |
| Temperature                                                    | 193(2) K                                                              |
| Wavelength, radiation type                                     | 0.71073Å, MoK $\alpha$                                                |
| Diffractionmeter                                               | STOE IPDS 2T                                                          |
| Crystal system                                                 | Monoclinic                                                            |
| Space group name, number                                       | P 21/c, (14)                                                          |
| Unit cell dimensions                                           | a = 15.1413(12) Å<br>b = 6.9179(4) Å<br>c = 13.0938(8) Å              |
| Volume                                                         | 1324.16(16) Å <sup>3</sup>                                            |
| Number of reflections<br>and range used for lattice parameters | 10813<br>2.79° ≤ $\theta$ ≤ 28.30°                                    |
| Z                                                              | 4                                                                     |
| Density (calculated)                                           | 1.651 Mg/m <sup>3</sup>                                               |
| Absorption coefficient                                         | 3.115 mm <sup>-1</sup>                                                |
| Absorption correction                                          | Integration                                                           |
| Max. and min. transmission                                     | 0.7525 and 0.3237                                                     |
| F(000)                                                         | 664                                                                   |
| Crystal size, colour and form                                  | 0.100 x 0.320 x 0.340 mm <sup>3</sup> , colourless plate              |
| Theta range for data collection                                | 2.787 to 28.270°.                                                     |
| Index ranges                                                   | -20 ≤ h ≤ 16, -9 ≤ k ≤ 9, -17 ≤ l ≤ 17                                |
| Number of reflections:                                         |                                                                       |
| collected                                                      | 6912                                                                  |
| independent                                                    | 3252 [R(int) = 0.0167]                                                |
| observed [I > 2 $\sigma$ (I)]                                  | 2727                                                                  |
| Completeness to $\theta$ = 25.2°                               | 99.8 %                                                                |
| Refinement method                                              | Full-matrix least-squares on F <sup>2</sup>                           |
| Data / restraints / parameters                                 | 3252 / 15 / 221                                                       |
| Goodness-of-fit on F <sup>2</sup>                              | 1.126                                                                 |
| Final R indices [I > 2 $\sigma$ (I)]                           | R1 = 0.0337, wR2 = 0.0679                                             |
| R indices (all data)                                           | R1 = 0.0463, wR2 = 0.0740                                             |
| Largest diff. peak and hole                                    | 0.414 and -0.472 eÅ <sup>-3</sup>                                     |

Table S9. Atomic coordinates and equivalent isotropic displacement parameters ( $\text{\AA}^2$ ) for 2.  $U(\text{eq})$  is defined as one third of the trace of the orthogonalized  $U_{ij}$  tensor.

| Atom | x           | y          | z            | $U(\text{eq})$ |
|------|-------------|------------|--------------|----------------|
| Br1  | 0.19016(2)  | 0.50988(4) | 0.29226(2)   | 0.03244(8)     |
| C1   | 0.48154(16) | 0.3302(3)  | 0.15510(17)  | 0.0220(4)      |
| N2   | 0.48914(14) | 0.2848(3)  | 0.05977(15)  | 0.0266(4)      |
| N3   | 0.40356(15) | 0.2781(3)  | -0.00856(15) | 0.0283(4)      |
| C4   | 0.34436(17) | 0.3216(3)  | 0.04701(17)  | 0.0240(5)      |
| C5   | 0.24865(18) | 0.3430(4)  | 0.0151(2)    | 0.0300(5)      |
| C6   | 0.20330(18) | 0.3960(4)  | 0.0872(2)    | 0.0301(5)      |
| C7   | 0.25373(17) | 0.4291(3)  | 0.19352(19)  | 0.0245(5)      |
| C8   | 0.34516(16) | 0.4079(3)  | 0.22636(18)  | 0.0220(4)      |
| N9   | 0.39053(13) | 0.3536(3)  | 0.15181(14)  | 0.0206(4)      |
| C10  | 0.56116(15) | 0.3556(3)  | 0.24515(17)  | 0.0208(4)      |
| C11  | 0.56147(16) | 0.3177(3)  | 0.35009(18)  | 0.0225(4)      |
| C12  | 0.64329(17) | 0.3331(3)  | 0.42755(19)  | 0.0258(5)      |
| N13  | 0.72308(14) | 0.3813(3)  | 0.40792(16)  | 0.0266(4)      |
| C14  | 0.72165(18) | 0.4220(3)  | 0.3069(2)    | 0.0272(5)      |
| C15  | 0.64347(17) | 0.4118(3)  | 0.22508(19)  | 0.0245(5)      |
| O1W  | 0.90122(13) | 0.3325(3)  | 0.53186(14)  | 0.0323(4)      |
| O2W  | 0.92288(16) | 0.0243(3)  | 0.67136(17)  | 0.0449(5)      |
| O3W  | 1.00321(14) | 0.3335(3)  | 0.38121(15)  | 0.0359(4)      |

Table S10. Anisotropic displacement parameters ( $\text{\AA}^2$ ) for 2. The anisotropic displacement factor exponent takes the form:  $-2\pi^2 [h^2 a^{*2} U_{11} + \dots + 2 h k a^* b^* U_{12}]$

| Atom | $U_{11}$    | $U_{22}$    | $U_{33}$    | $U_{23}$    |
|------|-------------|-------------|-------------|-------------|
| Br1  | 0.03013(13) | 0.03722(14) | 0.03526(13) | 0.00485(11) |
| C1   | 0.0267(12)  | 0.0214(10)  | 0.0208(10)  | 0.0023(8)   |
| N2   | 0.0331(11)  | 0.0283(10)  | 0.0211(9)   | -0.0003(8)  |
| N3   | 0.0348(11)  | 0.0307(10)  | 0.0201(9)   | -0.0023(8)  |
| C4   | 0.0318(12)  | 0.0224(10)  | 0.0174(10)  | -0.0015(8)  |
| C5   | 0.0343(14)  | 0.0280(12)  | 0.0240(12)  | -0.0027(10) |
| C6   | 0.0266(13)  | 0.0277(12)  | 0.0336(13)  | 0.0011(10)  |
| C7   | 0.0283(12)  | 0.0204(10)  | 0.0274(11)  | 0.0029(9)   |
| C8   | 0.0265(11)  | 0.0216(10)  | 0.0188(10)  | 0.0019(8)   |
| N9   | 0.0249(10)  | 0.0190(8)   | 0.0187(8)   | 0.0006(7)   |
| C10  | 0.0253(11)  | 0.0170(9)   | 0.0218(10)  | 0.0008(8)   |
| C11  | 0.0245(11)  | 0.0218(10)  | 0.0239(11)  | 0.0013(8)   |
| C12  | 0.0297(12)  | 0.0257(11)  | 0.0228(11)  | 0.0012(9)   |
| N13  | 0.0257(10)  | 0.0265(10)  | 0.0275(10)  | -0.0019(8)  |
| C14  | 0.0267(12)  | 0.0240(11)  | 0.0340(13)  | -0.0010(10) |
| C15  | 0.0297(12)  | 0.0224(10)  | 0.0245(11)  | 0.0029(9)   |
| O1W  | 0.0256(9)   | 0.0385(10)  | 0.0318(10)  | -0.0007(8)  |
| O2W  | 0.0490(13)  | 0.0393(11)  | 0.0376(11)  | -0.0034(9)  |
| O3W  | 0.0397(11)  | 0.0389(11)  | 0.0317(10)  | -0.0067(8)  |

Table S11. Hydrogen coordinates and isotropic displacement parameters ( $\text{\AA}^2$ ) for 2.

| Atom | x        | y         | z         | U(eq)     |
|------|----------|-----------|-----------|-----------|
| H5   | 0.222(2) | 0.327(4)  | -0.053(2) | 0.032(7)  |
| H6   | 0.140(2) | 0.411(5)  | 0.070(2)  | 0.041(8)  |
| H8   | 0.377(2) | 0.428(4)  | 0.293(2)  | 0.023(7)  |
| H11  | 0.507(2) | 0.278(4)  | 0.367(2)  | 0.023(6)  |
| H12  | 0.646(2) | 0.305(4)  | 0.495(2)  | 0.031(7)  |
| H14  | 0.777(2) | 0.457(4)  | 0.294(2)  | 0.026(7)  |
| H15  | 0.644(2) | 0.445(4)  | 0.158(2)  | 0.033(8)  |
| H1W  | 0.847(1) | 0.347(5)  | 0.500(2)  | 0.053(7)  |
| H2W  | 0.911(2) | 0.239(4)  | 0.571(2)  | 0.053(7)  |
| H3W  | 0.949(3) | 0.062(6)  | 0.731(2)  | 0.076(10) |
| H4W  | 0.949(3) | -0.073(4) | 0.660(3)  | 0.076(10) |
| H5W  | 0.970(2) | 0.321(5)  | 0.421(2)  | 0.055(7)  |
| H6W  | 1.039(2) | 0.421(4)  | 0.407(3)  | 0.055(7)  |

Table S12. Bond lengths [ $\text{\AA}$ ] and angles [ $^\circ$ ] for 2.

| Bond lengths [ $\text{\AA}$ ] |           | Bond angles [ $^\circ$ ] |            |
|-------------------------------|-----------|--------------------------|------------|
| Br1-C7                        | 1.886(2)  | N2-C1-N9                 | 109.3(2)   |
| C1-N2                         | 1.321(3)  | N2-C1-C10                | 122.3(2)   |
| C1-N9                         | 1.377(3)  | N9-C1-C10                | 128.30(19) |
| C1-C10                        | 1.461(3)  | C1-N2-N3                 | 108.95(19) |
| N2-N3                         | 1.370(3)  | C4-N3-N2                 | 107.04(18) |
| N3-C4                         | 1.328(3)  | N3-C4-N9                 | 109.9(2)   |
| C4-N9                         | 1.386(3)  | N3-C4-C5                 | 130.6(2)   |
| C4-C5                         | 1.408(4)  | N9-C4-C5                 | 119.5(2)   |
| C5-C6                         | 1.354(4)  | C6-C5-C4                 | 119.4(2)   |
| C5-H5                         | 0.88(3)   | C6-C5-H5                 | 123.5(19)  |
| C6-C7                         | 1.422(4)  | C4-C5-H5                 | 116.9(19)  |
| C6-H6                         | 0.93(3)   | C5-C6-C7                 | 119.1(2)   |
| C7-C8                         | 1.346(3)  | C5-C6-H6                 | 122.7(19)  |
| C8-N9                         | 1.384(3)  | C7-C6-H6                 | 118.2(19)  |
| C8-H8                         | 0.89(3)   | C8-C7-C6                 | 122.7(2)   |
| C10-C15                       | 1.394(3)  | C8-C7-Br1                | 118.63(18) |
| C10-C11                       | 1.398(3)  | C6-C7-Br1                | 118.65(18) |
| C11-C12                       | 1.386(3)  | C7-C8-N9                 | 117.5(2)   |
| C11-H11                       | 0.95(3)   | C7-C8-H8                 | 123.0(18)  |
| C12-N13                       | 1.341(3)  | N9-C8-H8                 | 119.5(18)  |
| C12-H12                       | 0.89(3)   | C1-N9-C8                 | 133.4(2)   |
| N13-C14                       | 1.347(3)  | C1-N9-C4                 | 104.76(18) |
| C14-C15                       | 1.376(4)  | C8-N9-C4                 | 121.8(2)   |
| C14-H14                       | 0.93(3)   | C15-C10-C11              | 117.6(2)   |
| C15-H15                       | 0.91(3)   | C15-C10-C1               | 118.1(2)   |
| O1W-H1W                       | 0.826(19) | C11-C10-C1               | 124.2(2)   |
| O1W-H2W                       | 0.814(19) | C12-C11-C10              | 118.6(2)   |
| O2W-H3W                       | 0.82(2)   | C12-C11-H11              | 121.0(16)  |
| O2W-H4W                       | 0.81(2)   | C10-C11-H11              | 120.4(16)  |
| O3W-H5W                       | 0.817(19) | N13-C12-C11              | 123.9(2)   |
| O3W-H6W                       | 0.825(19) | N13-C12-H12              | 115.6(19)  |
|                               |           | C11-C12-H12              | 120.5(19)  |
|                               |           | C12-N13-C14              | 117.1(2)   |
|                               |           | N13-C14-C15              | 123.0(2)   |
|                               |           | N13-C14-H14              | 116.7(17)  |

|             |           |
|-------------|-----------|
| C15-C14-H14 | 120.3(17) |
| C14-C15-C10 | 119.8(2)  |
| C14-C15-H15 | 120.8(19) |
| C10-C15-H15 | 119.3(19) |
| H1W-O1W-H2W | 114(4)    |
| H3W-O2W-H4W | 107(4)    |
| H5W-O3W-H6W | 105(3)    |

Table S13. Torsion angles [°] for 2.

|                 |             |
|-----------------|-------------|
| N9-C1-N2-N3     | 0.3(3)      |
| C10-C1-N2-N3    | -177.8(2)   |
| C1-N2-N3-C4     | 0.4(3)      |
| N2-N3-C4-N9     | -1.0(3)     |
| N2-N3-C4-C5     | 177.1(2)    |
| N3-C4-C5-C6     | -177.4(3)   |
| N9-C4-C5-C6     | 0.5(4)      |
| C4-C5-C6-C7     | 0.1(4)      |
| C5-C6-C7-C8     | -0.8(4)     |
| C5-C6-C7-Br1    | 178.25(19)  |
| C6-C7-C8-N9     | 0.7(4)      |
| Br1-C7-C8-N9    | -178.29(15) |
| N2-C1-N9-C8     | -176.9(2)   |
| C10-C1-N9-C8    | 1.0(4)      |
| N2-C1-N9-C4     | -0.9(2)     |
| C10-C1-N9-C4    | 177.0(2)    |
| C7-C8-N9-C1     | 175.5(2)    |
| C7-C8-N9-C4     | -0.1(3)     |
| N3-C4-N9-C1     | 1.2(2)      |
| C5-C4-N9-C1     | -177.2(2)   |
| N3-C4-N9-C8     | 177.8(2)    |
| C5-C4-N9-C8     | -0.6(3)     |
| N2-C1-C10-C15   | 26.6(3)     |
| N9-C1-C10-C15   | -151.0(2)   |
| N2-C1-C10-C11   | -150.0(2)   |
| N9-C1-C10-C11   | 32.4(4)     |
| C15-C10-C11-C12 | -1.6(3)     |
| C1-C10-C11-C12  | 175.0(2)    |
| C10-C11-C12-N13 | -0.5(4)     |
| C11-C12-N13-C14 | 2.0(4)      |
| C12-N13-C14-C15 | -1.5(4)     |
| N13-C14-C15-C10 | -0.5(4)     |
| C11-C10-C15-C14 | 2.1(3)      |
| C1-C10-C15-C14  | -174.7(2)   |

Table S14. Hydrogen bonds for 2 [ $\text{\AA}$  and °].

| D-H...A         | d(D-H)    | d(H...A) | d(D...A) | <(DHA) |
|-----------------|-----------|----------|----------|--------|
| O1W-H1W...N13   | 0.826(19) | 1.96(2)  | 2.783(3) | 173(3) |
| O1W-H2W...O2W   | 0.814(19) | 1.96(2)  | 2.771(3) | 174(4) |
| O2W-H3W...O3W#1 | 0.82(2)   | 2.06(2)  | 2.873(3) | 175(4) |
| O2W-H4W...O3W#2 | 0.81(2)   | 2.07(2)  | 2.873(3) | 171(4) |
| O3W-H5W...O1W   | 0.817(19) | 2.00(2)  | 2.804(3) | 170(4) |
| O3W-H6W...O1W#3 | 0.825(19) | 2.00(2)  | 2.805(3) | 167(4) |

## Supplementary Information

Symmetry transformations used to generate equivalent atoms:

#1  $x, -y+1/2, z+1/2$     #2  $-x+2, -y, -z+1$     #3  $-x+2, -y+1, -z+1$
